# Supplementary material for: Encorafenib plus cetuximab with or without binimetinib in patients with BRAF V600E-mutated metastatic colorectal cancer: real-life data from an Italian multicenter experience
Source: PubMed Central journal article supplement — ESMO Open. 2022 Jun 10;7(3):100506. doi: 10.1016/j.esmoop.2022.100506 (PMC9271503; doi:10.1016/j.esmoop.2022.100506), 2022-06-10
Supplement: mmc2.pdf [file mmc2.pdf]

| Subgroup | Enco/Cetux<br>Events/N (%) |  | Enco/Cetux/Bini<br>Events/N (%) |  | HR (95% CI) | P Value |
|----------|----------------------------|--|---------------------------------|--|-------------|---------|
|----------|----------------------------|--|---------------------------------|--|-------------|---------|

**Progression-free survival**

**Adjusted MAF**

0.755

|        |       |        |     |        |                   |
|--------|-------|--------|-----|--------|-------------------|
| Clonal | 10/16 | (62.5) | 5/5 | ( 100) | 1.30 (0.44, 3.85) |
|--------|-------|--------|-----|--------|-------------------|

|           |       |        |     |        |                   |
|-----------|-------|--------|-----|--------|-------------------|
| Subclonal | 19/24 | (79.2) | 8/8 | ( 100) | 1.62 (0.70, 3.75) |
|-----------|-------|--------|-----|--------|-------------------|

**Overall Survival**

**Adjusted MAF**

0.563

|        |      |        |     |        |                   |
|--------|------|--------|-----|--------|-------------------|
| Clonal | 7/16 | (43.8) | 3/5 | (60.0) | 0.86 (0.22, 3.38) |
|--------|------|--------|-----|--------|-------------------|

|           |       |        |     |        |                   |
|-----------|-------|--------|-----|--------|-------------------|
| Subclonal | 15/24 | (62.5) | 7/8 | (87.5) | 1.39 (0.56, 3.41) |
|-----------|-------|--------|-----|--------|-------------------|

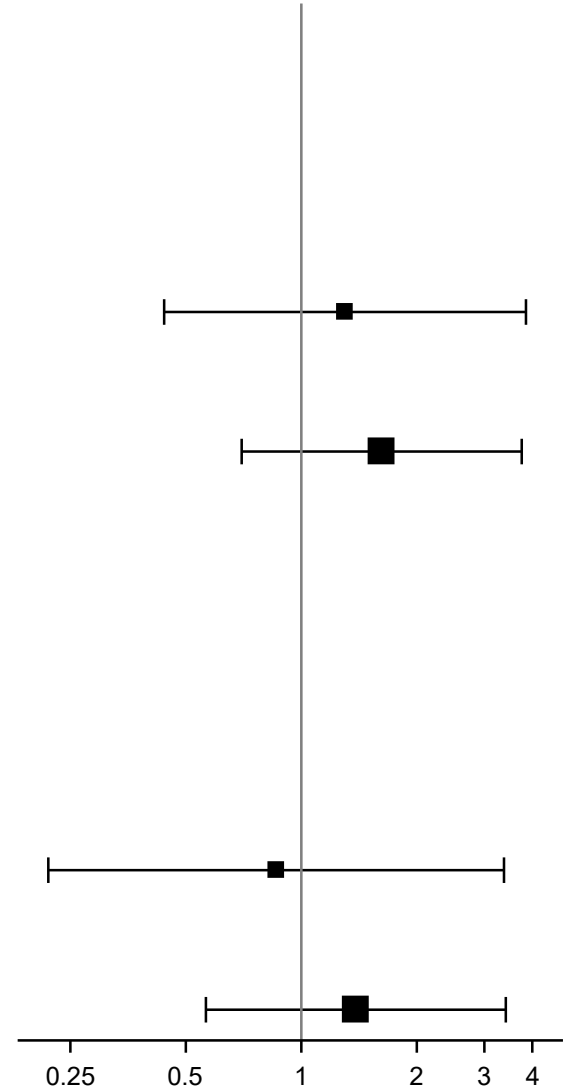

← Enco/Cetux/Bini    Enco/Cetux →
